# Supplementary material for: A glucose modified filter paper for effective oil/water separation
Source: Royal Society of Chemistry journal article supplement (doi:10.1039/c8ra04328k), 2018-01-01
Supplement: c8ra04328k1.pdf [file c8ra04328k1.pdf]

## A glucose modified filter paper for effective oil/water separation

Zhonglin Luo,<sup>\*abc</sup> Cong Duan,<sup>a</sup> Yan Li,<sup>a</sup> Yanbin Wang,<sup>ab</sup> Biaobing Wang<sup>\*ab</sup>

<sup>a</sup> School of Material Science and Engineering, National Experimental Demonstration Center for Materials Science and Engineering (Changzhou University), Changzhou, 213164, P.R. China. E-mail: zhonglinluo@cczu.edu.cn; biaobing@cczu.edu.cn

<sup>b</sup> Jiangsu Collaborative Innovation Center of Photovoltaic Science and Engineering, Changzhou, Jiangsu, 213164, P.R. China

<sup>c</sup> State Key Laboratory of Molecular Engineering of Polymers (Fudan University), Shanghai, 200433, P.R. China

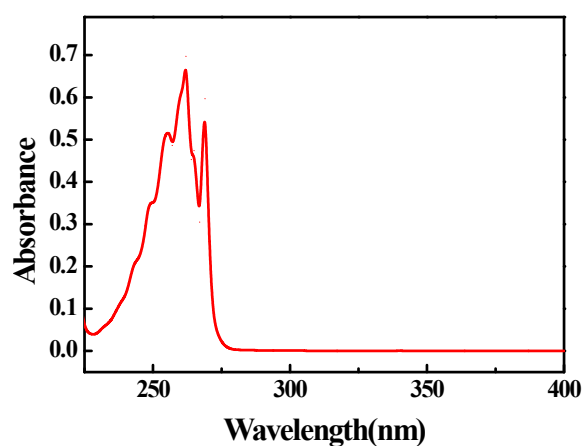

Fig. S1 The UV absorbance of toluene in hexane solution (0.5 g/L).

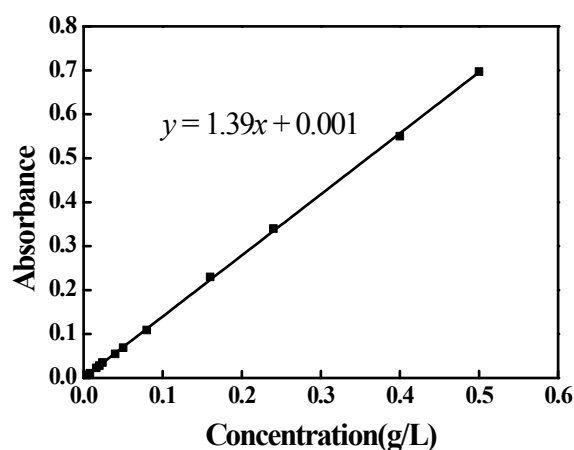

Fig. S2 UV absorbance at 262 nm as a function of toluene concentration in hexane solution.

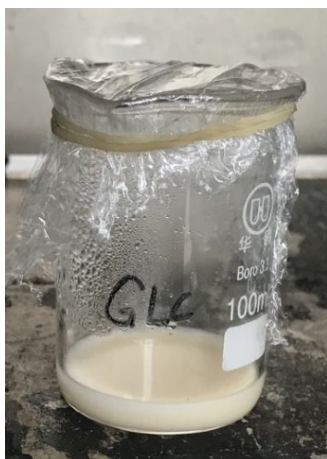

Fig. S3 The crosslinked network formed by mixing of glucose and glutaraldehyde solution.

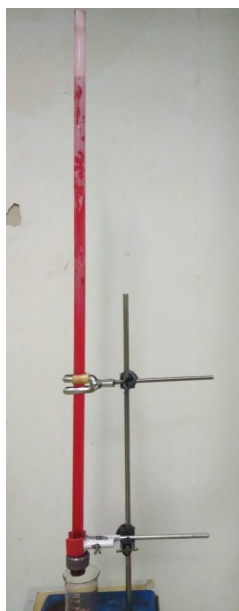

Fig. S4 A modified filter paper with an area of  $2.54 \text{ cm}^2$  could support a column of toluene 0.72 m, a column of hexane 0.83 m, and a column of petroleum ether 0.90 m in height, respectively.

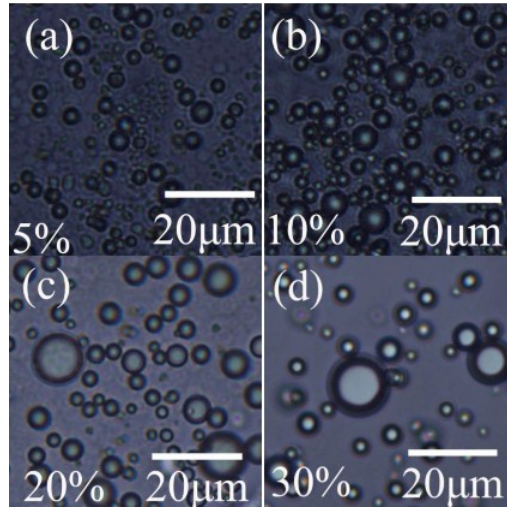

Fig. S5 The microscopic images of toluene-in-water emulsions.

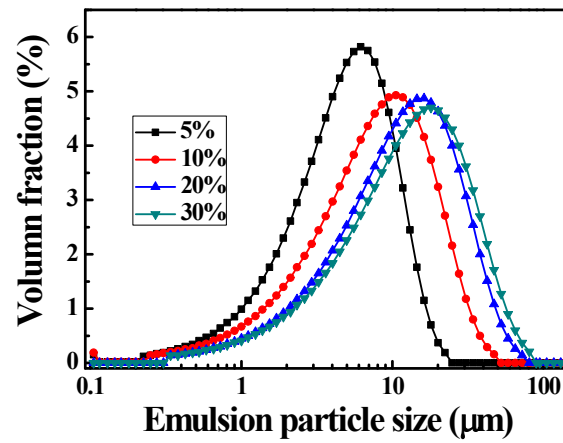

Fig. S6 The size distribution of toluene/water emulsion particles at different toluene volume fractions.

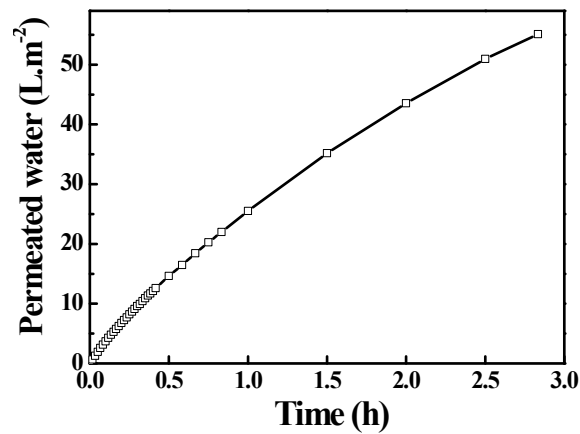

Fig. S7 The permeated water per unit area of 100 mL toluene-in-water emulsion vs. time.

Table S1 The thickness of filter papers after glucose treatment.

| glucose concentration/wt% | Thickness of filter paper/mm (pore size 2.5 $\mu\text{m}$ ) | Thickness of filter paper/mm (pore size 11 $\mu\text{m}$ ) | Thickness of filter paper/mm (pore size 25 $\mu\text{m}$ ) |
|---------------------------|-------------------------------------------------------------|------------------------------------------------------------|------------------------------------------------------------|
| Uncoated                  | 0.200 $\pm$ 0.003                                           | 0.179 $\pm$ 0.004                                          | 0.201 $\pm$ 0.004                                          |
| 2%                        | 0.204 $\pm$ 0.003                                           | 0.185 $\pm$ 0.005                                          | 0.205 $\pm$ 0.005                                          |
| 4%                        | 0.208 $\pm$ 0.005                                           | 0.188 $\pm$ 0.006                                          | 0.207 $\pm$ 0.005                                          |
| 10%                       | 0.214 $\pm$ 0.006                                           | 0.196 $\pm$ 0.005                                          | 0.213 $\pm$ 0.007                                          |
| Saturated                 | 0.220 $\pm$ 0.005                                           | 0.201 $\pm$ 0.005                                          | 0.219 $\pm$ 0.002                                          |

Table S2 The residual oil contents after toluene/water mixture (30:70 v/v) separation by the filter papers modified (pore size 25  $\mu\text{m}$ ) with different glucose solutions.

| glucose concentration/wt% | Toluene content mg/L |
|---------------------------|----------------------|
| Only GA                   | 5.76 $\pm$ 2.16      |
| 2% GLC                    | 4.56 $\pm$ 0.96      |
| 4% GLC                    | 4.32 $\pm$ 0.72      |
| 10% GLC                   | 6.96 $\pm$ 0.48      |
| Saturated GLC             | 8.16 $\pm$ 1.07      |

Table S3 The residual oil contents of toluene/water mixtures (30:70 v/v) in acidic, alkaline and saturated NaCl solutions.

| Oil/Water mixtures                | Toluene content mg/L |
|-----------------------------------|----------------------|
| H <sub>2</sub> O                  | 8.16 $\pm$ 1.07      |
| 2M H <sub>2</sub> SO <sub>4</sub> | 21.83 $\pm$ 12.68    |
| 2M NaOH                           | 28.78 $\pm$ 15.11    |
| Saturated NaCl                    | 19.19 $\pm$ 3.12     |

Table S4 The oil contents after toluene/water mixture (30:70 v/v) separations at different temperatures.

| Temperatures          | Toluene content mg/L |
|-----------------------|----------------------|
| 2 $^{\circ}\text{C}$  | 4.32 $\pm$ 0.88      |
| 30 $^{\circ}\text{C}$ | 8.16 $\pm$ 1.07      |
| 65 $^{\circ}\text{C}$ | 7.92 $\pm$ 3.31      |

Table S5 The average sizes of toluene/water emulsion droplets at different toluene volume fractions.

| Toluene volume fraction (v%) | Volume-average Emulsion particle size ( $\mu\text{m}$ ) | Area-average Emulsion particle size ( $\mu\text{m}$ ) |
|------------------------------|---------------------------------------------------------|-------------------------------------------------------|
| 5                            | 5.69                                                    | 2.79                                                  |
| 10                           | 10.05                                                   | 3.94                                                  |
| 20                           | 15.66                                                   | 6.09                                                  |
| 30                           | 16.84                                                   | 5.94                                                  |
